# Supplementary material for: Modulating the methanation activity of Ni by the crystal phase of TiO2
Source: Royal Society of Chemistry journal article supplement (doi:10.1039/c7cy00124j), 2017-01-01
Supplement: c7cy00124j1.pdf [file c7cy00124j1.pdf]

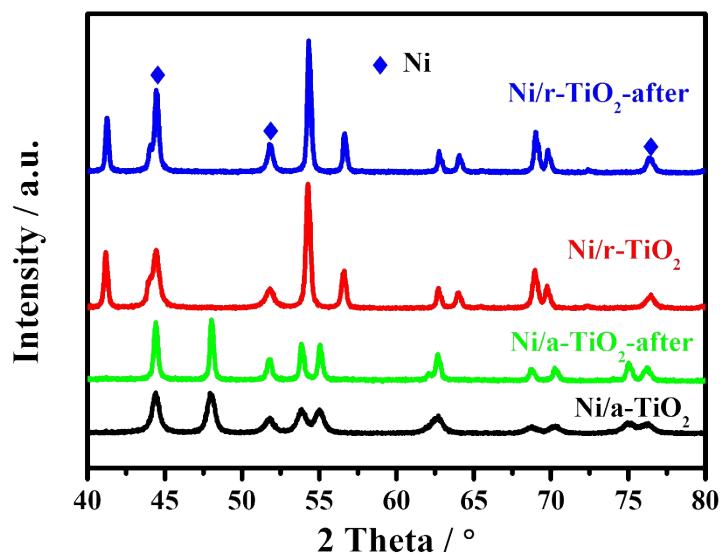

1

2 **Figure S1.** XRD patterns of Ni/a-TiO<sub>2</sub> and Ni/r-TiO<sub>2</sub> catalysts before and after  
 3 reaction test in Figure 1c.

4

5 **Table S1.** Surface areas of TiO<sub>2</sub> and the corresponding Ni/TiO<sub>2</sub> catalysts.

| Sample                | S <sub>BET</sub> (m <sup>2</sup> ·g <sup>-1</sup> ) |
|-----------------------|-----------------------------------------------------|
| a-TiO <sub>2</sub>    | 96.3                                                |
| r-TiO <sub>2</sub>    | 51.7                                                |
| Ni/a-TiO <sub>2</sub> | 61.7                                                |
| Ni/r-TiO <sub>2</sub> | 28.4                                                |

6

7

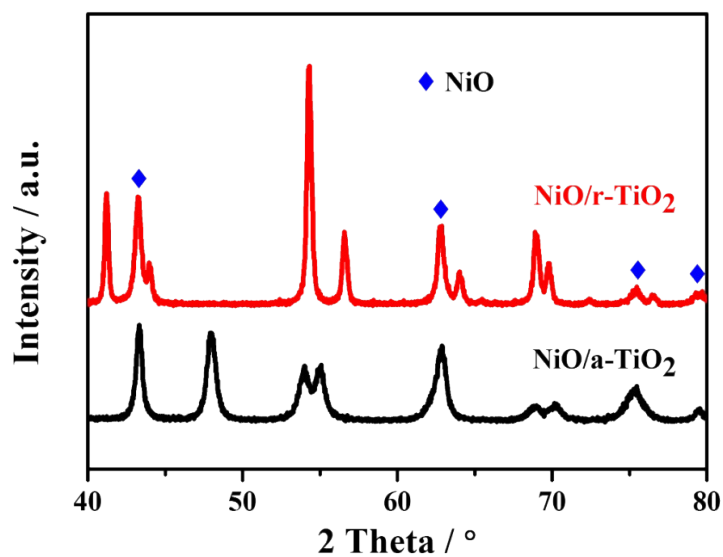

1

2 **Figure S2.** XRD patterns of the freshly prepared NiO/a-TiO<sub>2</sub> and NiO/r-TiO<sub>2</sub>.

3

4 **Table S2.** The particle size of NiO in the fresh catalysts.

| Sample                 | <sup>a</sup> NiO (nm) |
|------------------------|-----------------------|
| NiO/a-TiO <sub>2</sub> | 18.6                  |
| NiO/r-TiO <sub>2</sub> | 18.1                  |

<sup>a</sup> The NiO particle size in the fresh catalysts, estimated from XRD.

5

6

7

8

9

10

11

12

13

14

15

16

1 **Table S3.** The amount of H<sub>2</sub> adsorbed over Ni/a-TiO<sub>2</sub> and Ni/r-TiO<sub>2</sub> catalysts.

| Sample                | <sup>a</sup> H <sub>2</sub> adsorption amount (mmol) |
|-----------------------|------------------------------------------------------|
| Ni/a-TiO <sub>2</sub> | 0.0089                                               |
| Ni/r-TiO <sub>2</sub> | 0.0161                                               |

<sup>a</sup>: The catalyst mass is 401.0 mg.

2

3 The dispersity of Ni nanoparticles is estimated according to H<sub>2</sub>-TPD ( $D_{H_2-TPD}$ ) by  
 4 the following equations<sup>1</sup>:

$$D_{H_2-TPD} = \frac{N_H}{N_{Ni}}$$

5

$$N_{Ni} = \frac{m \cdot c}{M}$$

6

7 Where  $N_H$  is the mole number of H atoms measured from H<sub>2</sub>-TPD;  $N_{Ni}$  is the total  
 8 mole number of Ni;  $m$  is the mass of fresh catalysts, 401.0 mg and  $c$  is the Ni loading  
 9 in the fresh catalysts;  $M$  is the atomic weight of Ni, 58.69 g·mol<sup>-1</sup>.

10 The dispersity of Ni nanoparticles ( $D_{XRD}$ ) was estimated by assuming Ni  
 11 nanoparticle as a sphere, following the equations: <sup>1</sup>

$$D_{XRD} = \frac{n_s}{n} = \frac{4\pi \cdot R^2 \cdot a_m}{\frac{4\pi}{3} R^3 \cdot \rho_0 \cdot N_A \cdot M}$$

12

$$R = \frac{d}{2}$$

13

14 Where  $n_s$  is the number of Ni atoms on the surface of the sphere;  $n$  is the total number  
 15 of Ni atoms in the sphere;  $d$  is the mean diameter of Ni nanoparticles obtained from  
 16 XRD;  $a_m$  is the number of surface Ni atoms per unit m<sup>2</sup>, which is  $1.54 \times 10^{19} m^{-2}$   
 17 calculated for fcc Ni using the proportions of low index planes fcc(111):  
 18 (100):(110)=1:1:1;<sup>1</sup>  $\rho_0$  is the density of Ni,  $8.902 \times 10^6 g \cdot m^{-3}$ ;  $N_A$  is Avogadro's  
 19 constant,  $6.02 \times 10^{23} mol^{-1}$ ;  $M$  is the atomic weight of Ni, 58.69 g·mol<sup>-1</sup>.

1 TOF as defined as the CO converting per Ni site per time, is calculated by the  
2 following equations:

$$\begin{aligned} TOF &= \frac{CO \text{ conversion rate } (mol \cdot g_{cat}^{-1} \cdot h^{-1})}{\frac{WHSV \times S_{CO} \times CO \text{ conversion}}{V_m}} \\ &= \frac{CO \text{ conversion rate } (mol \cdot g_{cat}^{-1} \cdot h^{-1})}{Numbers \text{ of surface Ni atoms } (mol \cdot g_{cat}^{-1})} \end{aligned}$$

3  
4  
5  
6 The numbers of surface Ni atoms were determined by H<sub>2</sub>-TPD.  $S_{CO}$  is the volume  
7 fraction of CO in the feed gas, 23.75%; CO conversion is 20.0% for Ni/a-TiO<sub>2</sub> and  
8 16.8% for Ni/r-TiO<sub>2</sub>;  $V_m$  is the standard gas volume, 22400 ml/mol; WHSV is the total  
9 space velocity, which is  $6 \times 10^4 \text{ ml} \cdot g_{cat}^{-1} \cdot h^{-1}$  for Ni/a-TiO<sub>2</sub> and  
10  $6 \times 10^6 \text{ ml} \cdot g_{cat}^{-1} \cdot h^{-1}$  for Ni/r-TiO<sub>2</sub>.

11  
12  
13  
14  
15  
16  
17  
18  
19  
20  
21  
22  
23  
24  
25  
26

1

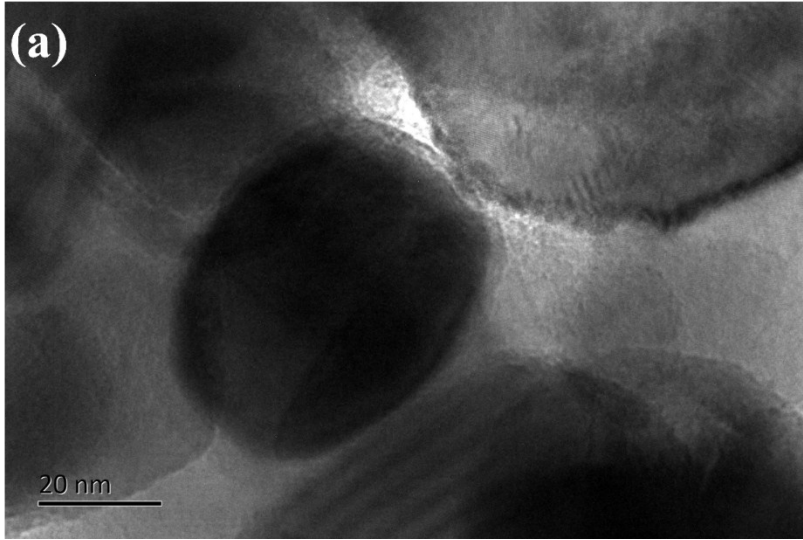

2

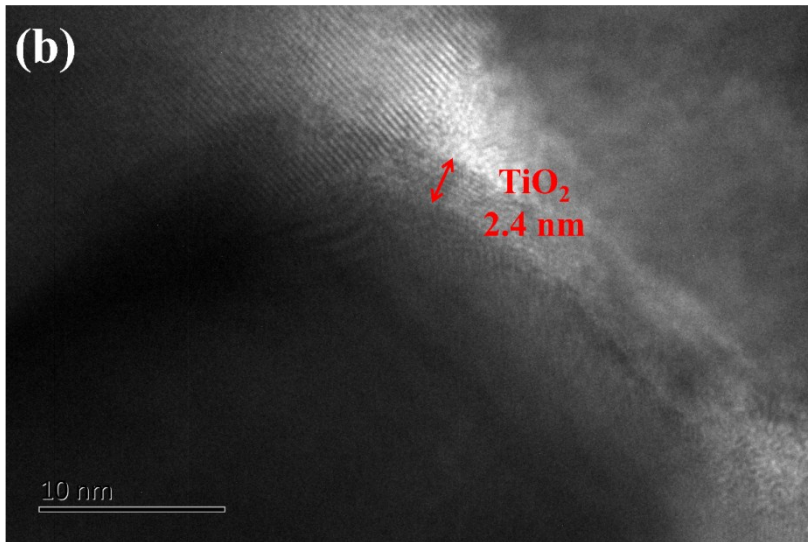

3

4

5

6

7

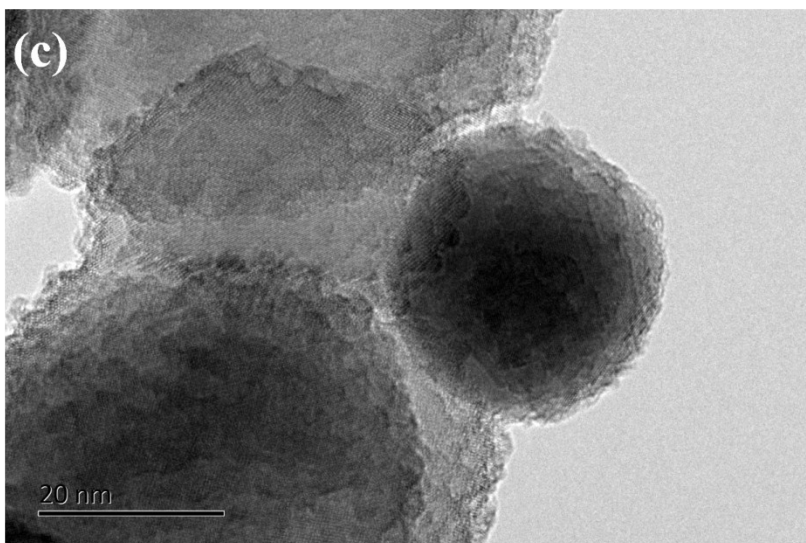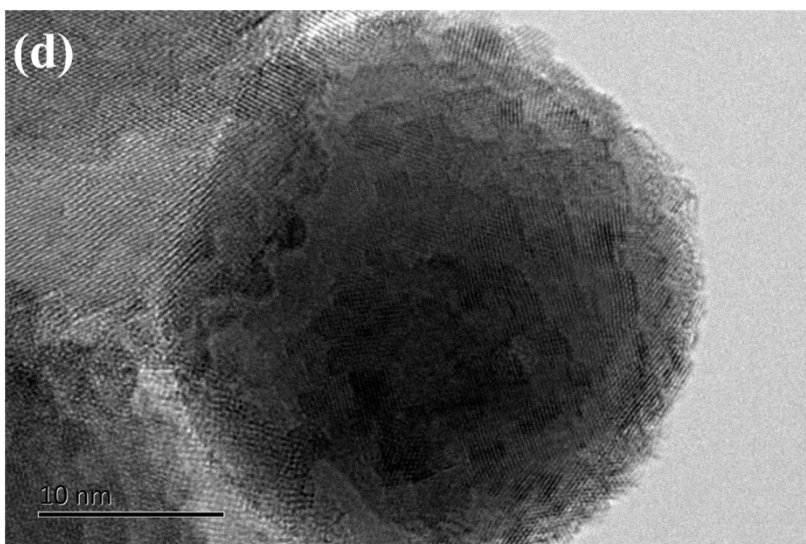

3 **Figure S3.** TEM images. (a) and (b) Ni/a-TiO<sub>2</sub>; (c) and (d) Ni/r-TiO<sub>2</sub> after reaction at  
4 500 °C.

5

6

7

8

9

10 **Reference**

11

- 12 1. G. Bergeret and P. Gallezot, in *Handbook of Heterogeneous Catalysis*, eds. G.  
13 Ertl, H. Knözinger, F. Schüth and J. Weitkamp, Wiley-VCH, 2008, pp. 738-  
14 765.

15
